# Supplementary material
Source: Preprints.org preprint supplement (doi:10.20944/preprints202010.0490.v1)
Supplement: Supplementary file 3 [file supplementary]

**National versus Local Sustainable Development Plans and Island Priorities in Sanitation: Examples from the Kingdom of Tonga. *Sustainability***

Ian White1*, Tony Falkland2 and Taaniela Kula3

| **Table S1.****Sanitation Priorities in Community Development Plans, Tonga** | | | | | | | | | | | | | | |
| --- | --- | --- | --- | --- | --- | --- | --- | --- | --- | --- | --- | --- | --- | --- |
| Notes |  |  |  |  |  |  |  |  |  |  |  |  |  |  |
| 1. The Ministry of Internal Affairs website (e.g. https://www.tongalocal.gov.to/haapai-community-development-plans) shows **117 of the 136** Community Development Plans of villages throughout Tonga launched on 4 Oct 2016 | | | | | | | | | | | | | | |
| 2. These list the top priority concerns of the villages | | | |  |  |  |  |  |  |  |  |  |  |  |
| 3. The table below summarises the priorities given by the women, youth and men of each village for sanitation together with calculated percentage rankings for the 3 categories and village averages | | | | | | | | | | | | | | |
| 4. NS means not shown in the priority list; ND means no data; CNC means could not calculate | | | | | | | |  |  |  |  |  |  |  |
|  |  |  |  |  |  |  |  |  |  |  |  |  |  |  |
| **Island Division** | **Island** | **District** | **Village** | **Number of priority items** | | | **Priority for sanitation problems** | | | | **% ranking for sanitation problems** | | | |
| **Women** | **Youth** | **Men** | **Women** | **Youth** | **Men** | **Village Average** | **Women** | **Youth** | **Men** | **Village Average** |
| **Tongatapu** | Tongatapu | Nukunuku | Nukunuku | 6 | 5 | 5 | NS | NS | NS | **CNC** | 0% | 0% | 0% | **0%** |
|  |  |  | Matafonua | 11 | 6 | 6 | NS | NS | NS | **CNC** | 0% | 0% | 0% | **0%** |
|  |  |  | Fatai | 6 | 6 | 6 | NS | NS | NS | **CNC** | 0% | 0% | 0% | **0%** |
|  |  |  | Lakepa | 5 | 5 | 7 | NS | NS | NS | **CNC** | 0% | 0% | 0% | **0%** |
|  |  |  | Vaotu’u | 6 | 5 | 5 | NS | NS | NS | **CNC** | 0% | 0% | 0% | **0%** |
|  |  |  | ‘Utulau | 6 | 7 | 8 | NS | NS | NS | **CNC** | 0% | 0% | 0% | **0%** |
|  |  |  | Ha’alalo | 7 | 5 | 7 | NS | NS | NS | **CNC** | 0% | 0% | 0% | **0%** |
|  |  |  | Ha’akame | 7 | 5 | 8 | NS | NS | NS | **CNC** | 0% | 0% | 0% | **0%** |
|  |  |  | Houma | 5 | 5 | 4 | NS | NS | NS | **CNC** | 0% | 0% | 0% | **0%** |
|  |  | Tatakamatonga | Holonga | 5 | 6 | 7 | NS | NS | NS | **CNC** | 0% | 0% | 0% | **0%** |
|  |  |  | Pelehake | 8 | 5 | 6 | NS | NS | NS | **CNC** | 0% | 0% | 0% | **0%** |
|  |  |  | ‘Alakifonua | 6 | 5 | 6 | NS | 4 | NS | **CNC** | 0% | 40% | 0% | **13%** |
|  |  |  | Nakolo | 6 | 5 | 6 | NS | NS | NS | **CNC** | 0% | 0% | 0% | **0%** |
|  |  |  | Ha’asini | 6 | 5 | 5 | NS | NS | NS | **CNC** | 0% | 0% | 0% | **0%** |
|  |  |  | Lavengatonga | 8 | 6 | 7 | NS | NS | NS | **CNC** | 0% | 0% | 0% | **0%** |
|  |  |  | Haveluliku | 5 | 5 | 5 | NS | NS | NS | **CNC** | 0% | 0% | 0% | **0%** |
|  |  | Vaini | Vaini | 7 | 7 | 8 | NS | NS | NS | **CNC** | 0% | 0% | 0% | **0%** |
|  |  |  | Malapo | 6 | 5 | 7 | NS | NS | NS | **CNC** | 0% | 0% | 0% | **0%** |
|  |  |  | Longoteme | 5 | 5 | 7 | NS | NS | NS | **CNC** | 0% | 0% | 0% | **0%** |
|  |  |  | Folaha | 6 | 4 | 5 | NS | NS | NS | **CNC** | 0% | 0% | 0% | **0%** |
|  |  |  | Veitongo | 6 | 6 | 7 | NS | NS | NS | **CNC** | 0% | 0% | 0% | **0%** |
|  |  |  | Lotoha'apai | 5 | 5 | 5 | NS | NS | NS | **CNC** | 0% | 0% | 0% | **0%** |
|  |  |  | Ha'ateiho | 6 | 5 | 6 | 5 | NS | NS | **CNC** | 33% | 0% | 0% | **11%** |
|  |  |  | Matangiake | 5 | 4 | 6 | NS | NS | NS | **CNC** | 0% | 0% | 0% | **0%** |
|  |  |  | Lomaiviti | 5 | 5 | 12 | NS | NS | NS | **CNC** | 0% | 0% | 0% | **0%** |
|  |  |  | Kaihoua | 8 | 5 | 5 | NS | NS | NS | **CNC** | 0% | 0% | 0% | **0%** |
|  |  |  | Tokomololo | 5 | 5 | 7 | NS | NS | NS | **CNC** | 0% | 0% | 0% | **0%** |
|  |  | Lapaha | Talasiu | 5 | 5 | 5 | NS | NS | NS | **CNC** | 0% | 0% | 0% | **0%** |
|  |  |  | Hoi | 6 | 5 | 5 | NS | NS | NS | **CNC** | 0% | 0% | 0% | **0%** |
|  |  |  | Nukuleka | 5 | 5 | 5 | NS | NS | NS | **CNC** | 0% | 0% | 0% | **0%** |
|  |  |  | Makaunga | 6 | 5 | 6 | NS | NS | NS | **CNC** | 0% | 0% | 0% | **0%** |
|  |  |  | Talafo’ou | 5 | 5 | 5 | NS | NS | NS | **CNC** | 0% | 0% | 0% | **0%** |
|  |  |  | Manuka | 5 | 5 | 5 | NS | NS | NS | **CNC** | 0% | 0% | 0% | **0%** |
|  |  |  | Kolonga | 6 | 5 | 6 | NS | NS | 4 | **CNC** | 0% | 0% | 50% | **17%** |
|  |  |  | Afa | 5 | 5 | 7 | NS | NS | NS | **CNC** | 0% | 0% | 0% | **0%** |
|  |  |  | Niutoua | 5 | 5 | 5 | 2 | NS | NS | **CNC** | 80% | 0% | 0% | **27%** |
|  | ‘Eueiki |  | ‘Eueiki | 6 | 5 | 5 | 4 | NS | NS | **CNC** | 50% | 0% | 0% | **17%** |
|  | Tongatapu | Kolovai | Kolovai | 5 | 6 | 7 | NS | NS | NS | **CNC** | 0% | 0% | 0% | **0%** |
|  |  |  | Te’ekiu | 7 | 7 | 7 | NS | NS | NS | **CNC** | 0% | 0% | 0% | **0%** |
|  |  |  | Masilamea | 6 | 4 | 6 | NS | NS | NS | **CNC** | 0% | 0% | 0% | **0%** |
|  |  |  | Fahefa | 6 | 5 | 7 | NS | NS | NS | **CNC** | 0% | 0% | 0% | **0%** |
|  |  |  | Ha'utu | 7 | 7 | 9 | NS | NS | NS | **CNC** | 0% | 0% | 0% | **0%** |
|  |  |  | Kala’au | 6 | 6 | 8 | NS | NS | NS | **CNC** | 0% | 0% | 0% | **0%** |
|  |  |  | Fo'ui | 8 | 7 | 8 | 6 | NS | NS | **CNC** | 38% | 0% | 0% | **13%** |
|  |  |  | 'Ahau | 6 | 6 | 9 | NS | NS | NS | **CNC** | 0% | 0% | 0% | **0%** |
|  |  |  | Kanokupolu | 8 | 5 | 6 | NS | NS | NS | **CNC** | 0% | 0% | 0% | **0%** |
|  |  |  | Ha’atafu | 8 | 6 | 8 | 5 | NS | NS | **CNC** | 50% | 0% | 0% | **17%** |
|  | ‘Atata |  | ‘Atata | 6 | 5 | 5 | NS | NS | NS | **CNC** | 0% | 0% | 0% | **0%** |
| **'Eua** | 'Eua | ‘Eua Motu’a | Tufuvai | 7 | 8 | 6 | 7 | 3 | NS | **5.0** | 14% | 75% | 0% | **30%** |
|  |  |  | Pangai | 8 | 7 | 6 | NS | NS | NS | **CNC** | 0% | 0% | 0% | **0%** |
|  |  |  | Houma | 7 | 11 | 6 | 2 | NS | 7 | **4.5** | 86% | 0% | 0% | **29%** |
|  |  |  | Ha’atu’a | 12 | 10 | 11 | 7 | NS | 9 | **8.0** | 50% | 0% | 27% | **26%** |
|  |  |  | Ta’anga | 11 | 8 | 8 | 4 | NS | NS | **CNC** | 73% | 0% | 0% | **24%** |
|  |  |  | Angaha | 8 | 9 | 8 | NS | NS | NS | **CNC** | 0% | 0% | 0% | **0%** |
|  |  |  | Futu | 7 | 6 | 6 | NS | NS | NS | **CNC** | 0% | 0% | 0% | **0%** |
|  |  |  | 'Esia | 8 | 6 | 8 | 6 | NS | NS | **CNC** | 38% | 0% | 0% | **13%** |
|  |  |  | Sapa'ata |  |  |  |  |  |  |  |  |  |  |  |
|  |  |  | Fata’ulua | 7 | 7 | 7 | NS | NS | 5 | **CNC** | 0% | 0% | 43% | **14%** |
|  |  |  | Mu'a | 8 | 7 | 7 | 7 | NS | NS | **CNC** | 25% | 0% | 0% | **8%** |
|  |  |  | Tongamama’o | 6 | 7 | 7 | NS | NS | NS | **CNC** | 0% | 0% | 0% | **0%** |
|  |  |  | Petani | 8 | 10 | 6 | 8 | NS | 6 | **7.0** | 13% | 0% | 17% | **10%** |
|  |  |  | Mata’aho | 10 | 8 | 11 | NS | 5 | 7 | **6.0** | 0% | 50% | 45% | **32%** |
| **Ha'apai** | Fotoha'a |  | Fotoha'a | 10 | 6 | 9 | NS | NS | NS | **CNC** | 0% | 0% | 0% | **0%** |
|  | Ha'afeva |  | Ha'afeva | 8 | 8 | 10 | 3 | 7 | 3 | **4.3** | 75% | 25% | 80% | **60%** |
|  | Kotu |  | Kotu | 7 | 7 | 12 | 4 | NS | 4 | **4.0** | 57% | 0% | 75% | **44%** |
|  | Matuku |  | Matuku | 9 | 7 | 6 | NS | NS | NS | **CNC** | 0% | 0% | 0% | **0%** |
|  | 'O'ua |  | 'O'ua |  |  |  |  |  |  |  |  |  |  |  |
|  | Tungua |  | Tungua | 9 | 8 | 10 | 2 | 6 | 3 | **3.7** | 89% | 38% | 80% | **69%** |
| **Vava'u** | Vava'u 'Utu | Hahake | Ha'akio | 8 | 5 | 7 | NS | NS | NS | **CNC** | 0% | 0% | 0% | **0%** |
|  |  |  | Ha'alaufuli | 9 | 8 | 8 | NS | NS | NS | **CNC** | 0% | 0% | 0% | **0%** |
|  | Koloa |  | Holeva | 10 | 9 | 10 | 7 | NS | 4 | **5.5** | 40% | 0% | 70% | **37%** |
|  | Vava'u 'Utu |  | Houma | 6 | 5 | 5 | 6 | NS | NS | **CNC** | 17% | 0% | 0% | **6%** |
|  | Koloa |  | Koloa | 8 | 7 | 9 | 4 | NS | NS | **CNC** | 63% | 0% | 0% | **21%** |
|  | Vava'u 'Utu |  | Mangia | 6 | 6 | 5 | NS | NS | NS | **CNC** | 0% | 0% | 0% | **0%** |
|  |  |  | Ta'anea | 8 | 9 | 6 | NS | NS | NS | **CNC** | 0% | 0% | 0% | **0%** |
|  |  |  | Tu'anekivale | 6 | 7 | 5 | NS | NS | 4 | **CNC** | 0% | 0% | 40% | **13%** |
|  |  | Hihifo | Longomapu | 6 | 7 | 8 | NS | NS | NS | **CNC** | 0% | 0% | 0% | **0%** |
|  |  |  | Taoa | 8 | 9 | 12 | 2 | NS | 10 | **6.0** | 88% | 0% | 25% | **38%** |
|  |  |  | Tefisi | 9 | 5 | 9 | 4 | NS | NS | **CNC** | 67% | 0% | 0% | **22%** |
|  |  |  | Tu'anuku | 7 | 6 | 5 | 2 | NS | NS | **CNC** | 86% | 0% | 0% | **29%** |
|  |  |  | Vaimalo | 8 | 7 | 8 | NS | NS | NS | **CNC** | 0% | 0% | 0% | **0%** |
|  |  | Leimatu'a | Leimatu'a | 7 | 5 | 7 | 3 | NS | NS | **CNC** | 71% | 0% | 0% | **24%** |
|  |  |  | Holonga | 12 | 9 | 6 | 4 | NS | NS | **CNC** | 75% | 0% | 0% | **25%** |
|  |  |  | Feletoa | 6 | 6 | 5 | 3 | NS | NS | **CNC** | 67% | 0% | 0% | **22%** |
|  |  |  | Mataika | 8 | 5 | 7 | 7 | NS | NS | **CNC** | 25% | 0% | 0% | **8%** |
|  | Pangaimotu | Pangaimotu | Pangaimotu | 7 | 6 | 7 | NS | NS | NS | **CNC** | 0% | 0% | 0% | **0%** |
|  |  |  | 'Utulei | 8 | 6 | 6 | NS | NS | NS | **CNC** | 0% | 0% | 0% | **0%** |
|  | 'Utungake |  | Talihau | 7 | 6 | 6 | NS | NS | NS | **CNC** | 0% | 0% | 0% | **0%** |
|  |  |  | 'Utungake | 5 | 5 | 6 | NS | NS | NS | **CNC** | 0% | 0% | 0% | **0%** |
|  | Kapa | Motu | Kapa | 9 | ND | 11 | 9 | ND | 11 | **10.0** | 11% | CNC | 9% | **10%** |
|  |  |  | Falevai | 9 | ND | 6 | NS | ND | NS | **CNC** | 0% | CNC | 0% | **0%** |
|  |  |  | 'Otea | 7 | 7 | 9 | 6 | NS | NS | **CNC** | 29% | 0% | 0% | **10%** |
|  | Lape |  | Lape | 8 | ND | 3 | NS | ND | NS | **CNC** | 0% | CNC | 0% | **0%** |
|  | Nuapapu |  | Matamaka | 5 | 8 | 6 | 2 | 4 | 2 | **2.7** | 80% | 63% | 83% | **75%** |
|  |  |  | Nuapapu | 10 | 9 | 8 | NS | 3 | NS | **CNC** | 0% | 78% | 0% | **26%** |
|  | Ovaka |  | Ovaka | 9 | 9 | 8 | 7 | NS | 2 | **4.5** | 33% | 0% | 88% | **40%** |
|  |  |  | Taunga | 7 | ND | 8 | 3 | ND | 5 | **4.0** | 71% | CNC | 50% | **61%** |
|  |  |  | Hunga | 6 | 8 | 9 | NS | 8 | NS | **CNC** | 0% | 13% | 0% | **4%** |
|  | Vava'u 'Utu | Neiafu | Neiafu | 6 | 6 | 10 | 2 | NS | 10 | **6.0** | 83% | 0% | 10% | **31%** |
|  |  |  | Fungamisi | 5 | 4 | 9 | NS | NS | 4 | **CNC** | 0% | 0% | 67% | **22%** |
|  |  |  | Falaleu | 6 | 4 | 5 | NS | NS | NS | **CNC** | 0% | 0% | 0% | **0%** |
|  |  |  | Makave | 4 | 5 | 5 | NS | NS | 3 | **3.0** | 0% | 0% | 60% | **20%** |
|  |  |  | Toula | 5 | 5 | 4 | NS | NS | 4 | **4.0** | 0% | 0% | 25% | **8%** |
|  |  |  | 'Utui | 6 | 3 | 6 | 3 | NS | NS | **3.0** | 67% | 0% | 0% | **22%** |
|  |  |  | Ofu | 6 | ND | 9 | 4 | ND | NS | **4.0** | 50% | CNC | 0% | **25%** |
|  | Okoa |  | Okoa | 7 | 6 | 4 | 7 | NS | 4 | **5.5** | 14% | 0% | 25% | **13%** |
|  | Olo'ua |  | Olo'ua | 8 | 4 | 6 | 3 | NS | 2 | **2.5** | 75% | 0% | 83% | **53%** |
| **Niuatoputapu** | Niuatoputapu | Niuatoputapu | Hihifo | 5 | 6 | 7 | NS | NS | NS | **CNC** | 0% | 0% | 0% | **0%** |
|  |  |  | Vaipoa | 5 | 4 | 9 | NS | NS | NS | **CNC** | 0% | 0% | 0% | **0%** |
|  |  |  | Falehau | 8 | 5 | 6 | NS | NS | NS | **CNC** | 0% | 0% | 0% | **0%** |
|  | Tafahi |  | Tafahi | 5 |  |  | 4 |  |  | **4.0** | 40% |  |  | **40%** |
| **Niuafo'ou** | Niuafo'ou | Niuafo'ou | 'Esia | 4 | 6 | 6 | NS | NS | NS | **CNC** | 0% | 0% | 0% | **0%** |
|  |  |  | Kolofo'ou | 5 | 5 | 4 | NS | NS | NS | **CNC** | 0% | 0% | 0% | **0%** |
|  |  |  | Sapa'ata | 5 | 5 | 5 | NS | 4 | NS | **CNC** | 0% | 40% | 0% | **13%** |
|  |  |  | Fata’ulua | 4 | 5 | 8 | NS | NS | NS | **CNC** | 0% | 0% | 0% | **0%** |
|  |  |  | Mata’aho | 4 | ND | 5 | NS | ND | 2 | **CNC** | 0% | CNC | 80% | **40%** |
|  |  |  | Mu'a | 5 | ND | 8 | 4 | ND | NS | **CNC** | 40% | CNC | 0% | **20%** |
|  |  |  | Tongamama’o | 5 | ND | 5 | NS | ND | NS | **CNC** | 0% | CNC | 0% | **0%** |
|  |  |  | Petani | 5 | 6 | 4 | NS | NS | NS | **CNC** | 0% | 0% | 0% | **0%** |
